# Supplementary material for: Immunity and mental illness: findings from a Danish population-based immunogenetic study of seven psychiatric and neurodevelopmental disorders
Source: PubMed Central journal article supplement (PMC6777475; doi:10.1038/s41431-019-0402-9), 2019-04-11
Supplement: 41431_2019_402_MOESM1_ESM.pdf [file 41431_2019_402_MOESM1_ESM.pdf]

# HLA-A

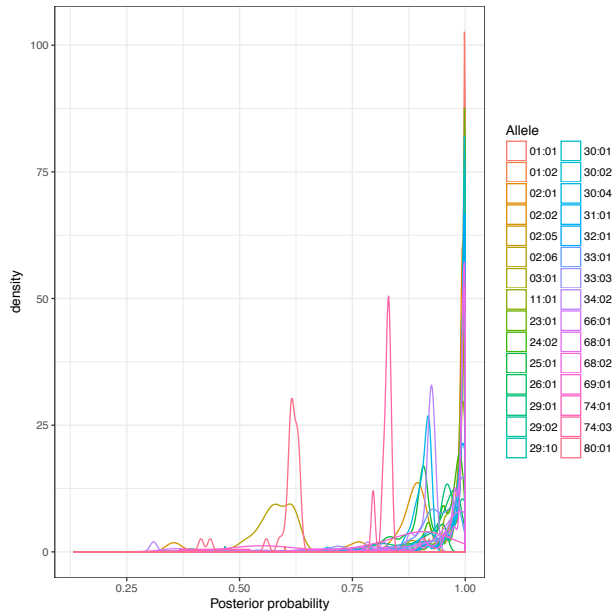

# HLA-B

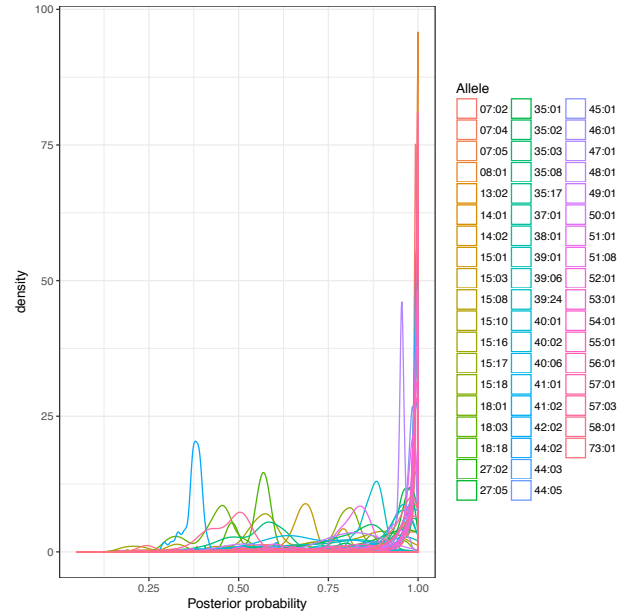

# HLA-C

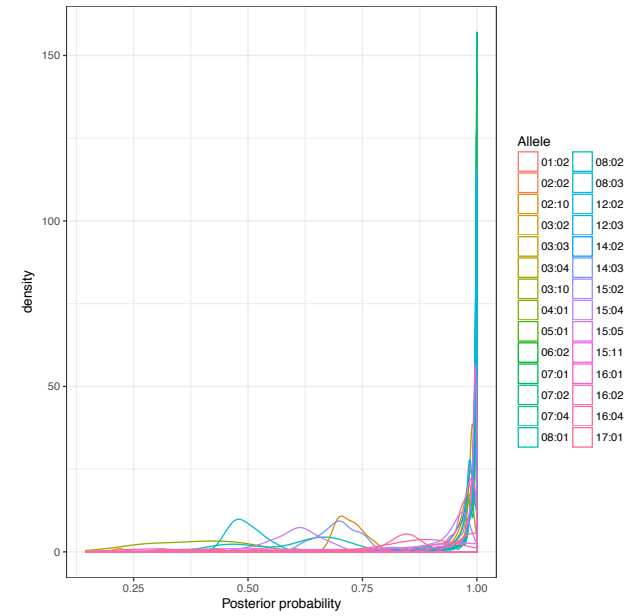

Supplementary Figure 1. HIBAG posterior probability density distributions for class I alleles.
