# Supplementary material for: Immunity and mental illness: findings from a Danish population-based immunogenetic study of seven psychiatric and neurodevelopmental disorders
Source: PubMed Central journal article supplement (PMC6777475; doi:10.1038/s41431-019-0402-9), 2019-04-11
Supplement: 41431_2019_402_MOESM3_ESM.pdf [file 41431_2019_402_MOESM3_ESM.pdf]

## HLA-B

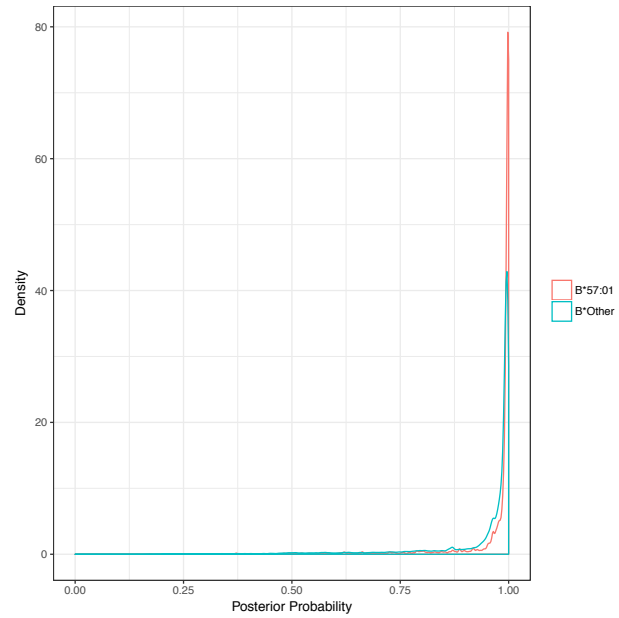

## HLA-DPB1

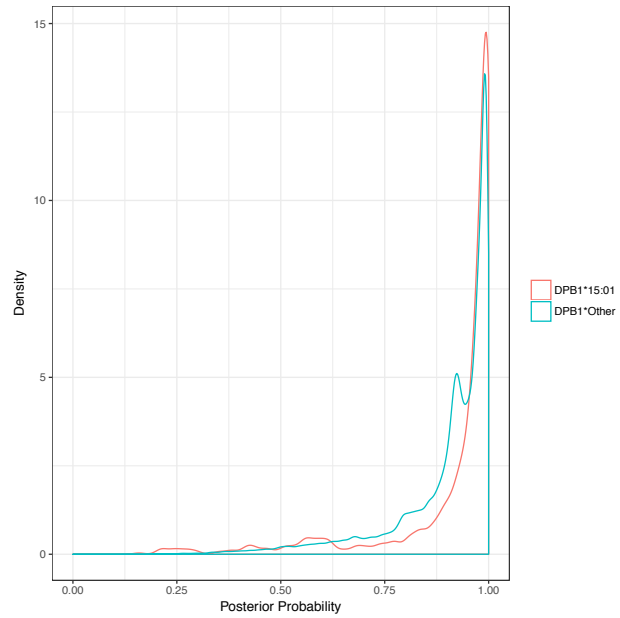

Supplementary Figure 3. HIBAG posterior probability density distributions for the significant alleles are shown in red (B\*57:01 and DPB1\*15:01). The other alleles from the respective locus are combined and shown in blue.
